# Supplementary material for: Controlling the morphologies and dynamics in three-dimensional tissues
Source: Research Square preprint supplement (doi:10.21203/rs.3.rs-6993695/v1), 2025-07-21
Supplement: Supplementary file 1 [file 56fdb3e5544d3beeb4cbbc80.pdf]

## Video Captions

- 1) Motion of cells at packing fraction  $\phi = 0.70$  and cell elasticity  $E = 0.2E_0$ . Cells rearrange rapidly in the liquid state.
- 2) Slow dynamics in the glass-like phase of cells at  $\phi = 0.70$  and  $E = 5E_0$ . Only at long times the cells undergo small displacements.
- 3) Movements of cells in the viscosity saturation phase (packing fraction  $\phi = 0.70$  at  $E = E_0$ ). Bigger cells move upon cooperative rearrangement of smaller cells.
